# Supplementary material for: SUMOylation of zebrafish transcription factor Zbtb21 affects its transcription activity
Source: PeerJ. 2024 Apr 22;12:e17234. doi: 10.7717/peerj.17234 (PMC11044885; doi:10.7717/peerj.17234)
Supplement: Supplemental Information 2 [file peerj-12-17234-s002.xlsx]

## Sheet: Sheet1
Figure2
zbtb14-promoter
1	PCS2	HA-Zbtb21	HA-Zbtb21K419R	HA-Zbtb21K845R	HA-Zbtb21K419+845R
	0.4314	0.5067	0.53645	0.5593	0.6505
	Ratio	Ratio	Ratio	Ratio	Ratio
	1	1.17455	1.24351	1.29648	1.50788
2	PCS2	HA-Zbtb21	HA-Zbtb21K419R	HA-Zbtb21K845R	HA-Zbtb21K419+845R
	1.8192	2.1202	2.33677	2.3525	2.40703
	Ratio	Ratio	Ratio	Ratio	Ratio
	1	1.16546	1.2845	1.29315	1.32313
3	PCS2	HA-Zbtb21	HA-Zbtb21K419R	HA-Zbtb21K845R	HA-Zbtb21K419+845R
	1.25097	1.41013	1.7515	1.71755	1.56545
	Ratio	Ratio	Ratio	Ratio	Ratio
	1	1.12723	1.40012	1.37298	1.25139
4	PCS2	HA-Zbtb21	HA-Zbtb21K419R	HA-Zbtb21K845R	HA-Zbtb21K419+845R
	1.8484	2.28033	2.54145	2.54925	2.6797
	Ratio	Ratio	Ratio	Ratio	Ratio
	1	1.23368	1.37495	1.37917	1.44974
5	PCS2	HA-Zbtb21	HA-Zbtb21K419R	HA-Zbtb21K845R	HA-Zbtb21K419+845R
	0.999533	1.16907	1.36465	1.36625	1.41495
	Ratio	Ratio	Ratio	Ratio	Ratio
	1	1.16961	1.36529	1.36689	1.41561
CDC6-promoter
1	PCS2	HA-Zbtb21	HA-Zbtb21K419R	HA-Zbtb21K845R	HA-Zbtb21K419+845R
	4.33317	2.8999	4.1122	3.19735	4.58917
	Ratio	Ratio	Ratio	Ratio	Ratio
	1	0.669233	0.949006	0.737878	1.05908
2	PCS2	HA-Zbtb21	HA-Zbtb21K419R	HA-Zbtb21K845R	HA-Zbtb21K419+845R
	4.657	3.36835	3.8412	3.67683	3.8157
	Ratio	Ratio	Ratio	Ratio	Ratio
	1	0.723288	0.824823	0.789528	0.819347
3	PCS2	HA-Zbtb21	HA-Zbtb21K419R	HA-Zbtb21K845R	HA-Zbtb21K419+845R
	3.9297	3.086	3.54327	2.4885	3.66233
	Ratio	Ratio	Ratio	Ratio	Ratio
	1	0.785302	0.901663	0.633254	0.931963
4	PCS2	HA-Zbtb21	HA-Zbtb21K419R	HA-Zbtb21K845R	HA-Zbtb21K419+845R
	2.6833	2.42635	2.0109	2.8702	2.88095
	Ratio	Ratio	Ratio	Ratio	Ratio
	1	0.904241	0.749413	1.06965	1.07366
5	PCS2	HA-Zbtb21	HA-Zbtb21K419R	HA-Zbtb21K845R	HA-Zbtb21K419+845R
	1.2484	0.87105	1.23877	1.16197	1.3148
	Ratio	Ratio	Ratio	Ratio	Ratio
	1	0.697733	0.992283	0.930765	1.05319
6	PCS2	HA-Zbtb21	HA-Zbtb21K419R	HA-Zbtb21K845R	HA-Zbtb21K419+845R
	0.4078	0.3617	0.41435	0.391	0.4259
	Ratio	Ratio	Ratio	Ratio	Ratio
	1	0.886954	1.01606	0.958803	1.04438
pu1-promoter
1	PCS2	HA-Zbtb21	HA-Zbtb21K419R	HA-Zbtb21K845R	HA-Zbtb21K419+845R
	0.7411	0.51985	0.6932	0.82555	0.81335
	Ratio	Ratio	Ratio	Ratio	Ratio
	1	0.701457	0.935366	1.11395	1.09749
2	PCS2	HA-Zbtb21	HA-Zbtb21K419R	HA-Zbtb21K845R	HA-Zbtb21K419+845R
	0.8688	0.6578	0.76035	0.6938	0.7482
	Ratio	Ratio	Ratio	Ratio	Ratio
	1	0.757136	0.875173	0.798573	0.861188
3	PCS2	HA-Zbtb21	HA-Zbtb21K419R	HA-Zbtb21K845R	HA-Zbtb21K419+845R
	0.33325	0.25175	0.33335	0.3604	0.3652
	Ratio	Ratio	Ratio	Ratio	Ratio
	1	0.755439	1.0003	1.08147	1.09587
4	PCS2	HA-Zbtb21	HA-Zbtb21K419R	HA-Zbtb21K845R	HA-Zbtb21K419+845R
	0.720233	0.621267	0.731333	0.70995	0.749833
	Ratio	Ratio	Ratio	Ratio	Ratio
	1	0.862591	1.01541	0.985722	1.0411
5	PCS2	HA-Zbtb21	HA-Zbtb21K419R	HA-Zbtb21K845R	HA-Zbtb21K419+845R
	0.7652	0.574067	0.6816	0.68935	0.720133
	Ratio	Ratio	Ratio	Ratio	Ratio
	1	0.750218	0.890748	0.900876	0.941105
